# Supplementary material for: Slow complexation dynamics between linear short polyphosphates and polyallylamines: analogies with “layer-by-layer” deposits
Source: Royal Society of Chemistry journal article supplement (doi:10.1039/c2cp23570f), 2011-12-21
Supplement: c2cp23570f.pdf [file c2cp23570f.pdf]

### Supporting Information

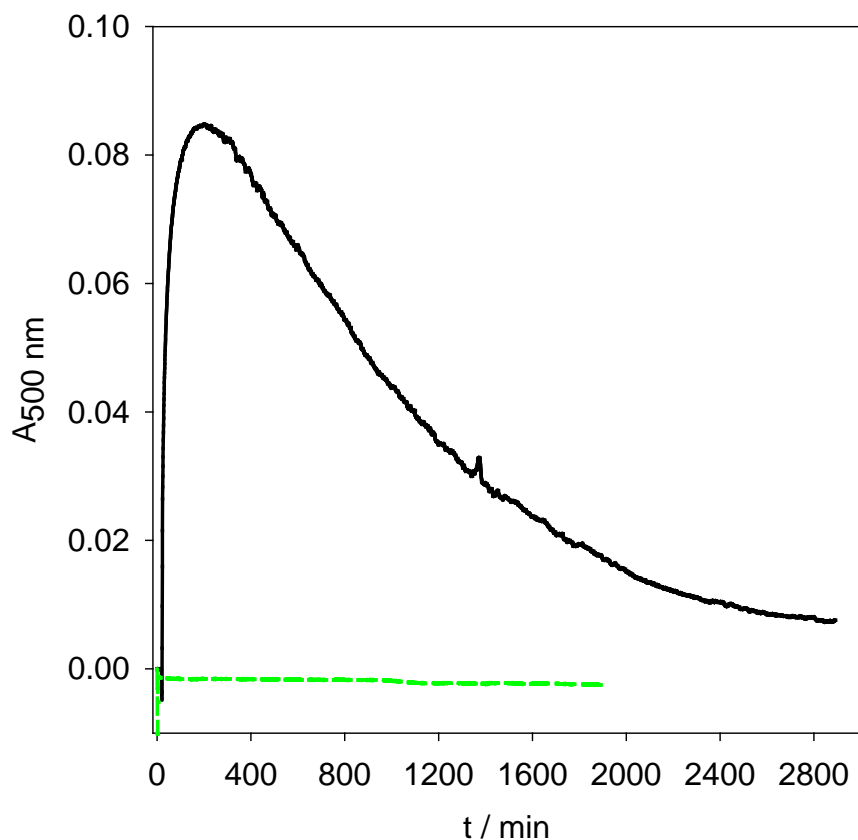

Figure 1 of SI: Evolution of the turbidity, quantified by the absorbance at  $\lambda=500$  nm, for a PSP solution ( $10^{-4}$  M in monomer units) injected in a PAH solution (\_\_\_\_\_,  $10^{-4}$  M in monomer units) or in a PDADMAC solution (\_\_\_\_\_,  $10^{-4}$  M in monomer units). The experiments were performed in the presence of 0.15 M NaCl.

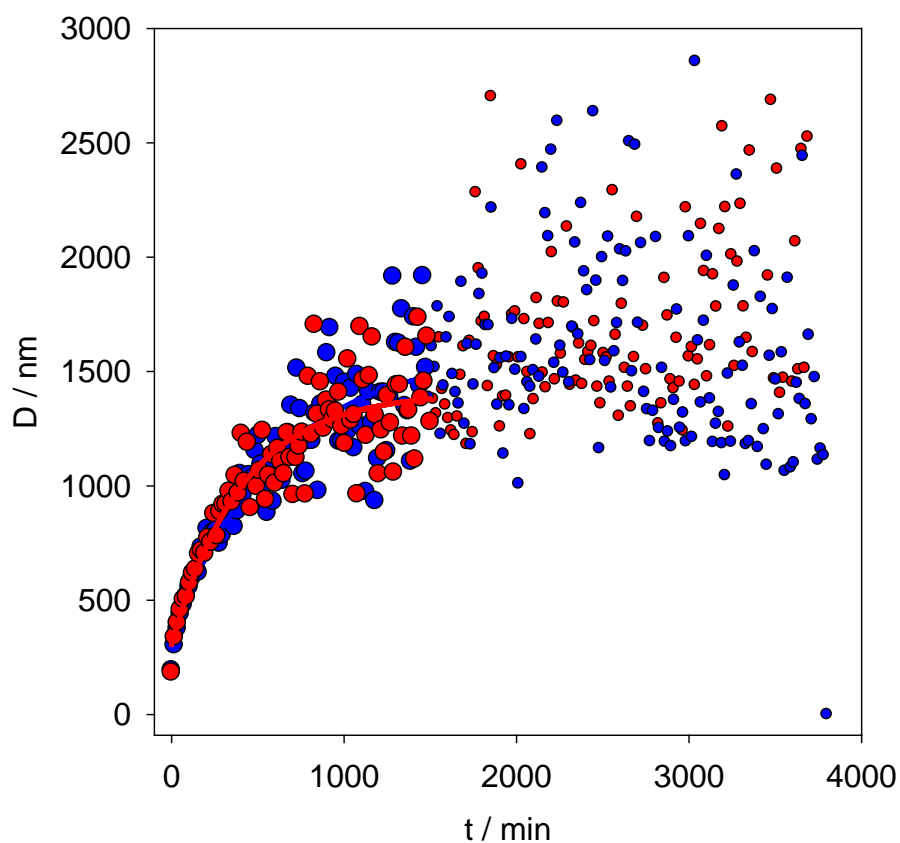

Figure 2 of SI: Evolution of the average hydrodynamic diameter of PAH-PSP "complexes" in the presence of 10 mM NaCl in the case where a volume  $V$  of PAH ( $2 \times 10^{-4}$  M in monomer units) is injected in an identical volume  $V$  of PSP ( $2 \times 10^{-4}$  M in monomer units) (●) or when the PSP solution is injected in the PAH solution (●). The full lines correspond to a fit of equation (1) to the experimental data. The fit was limited to the first 1500 min of the experiments.

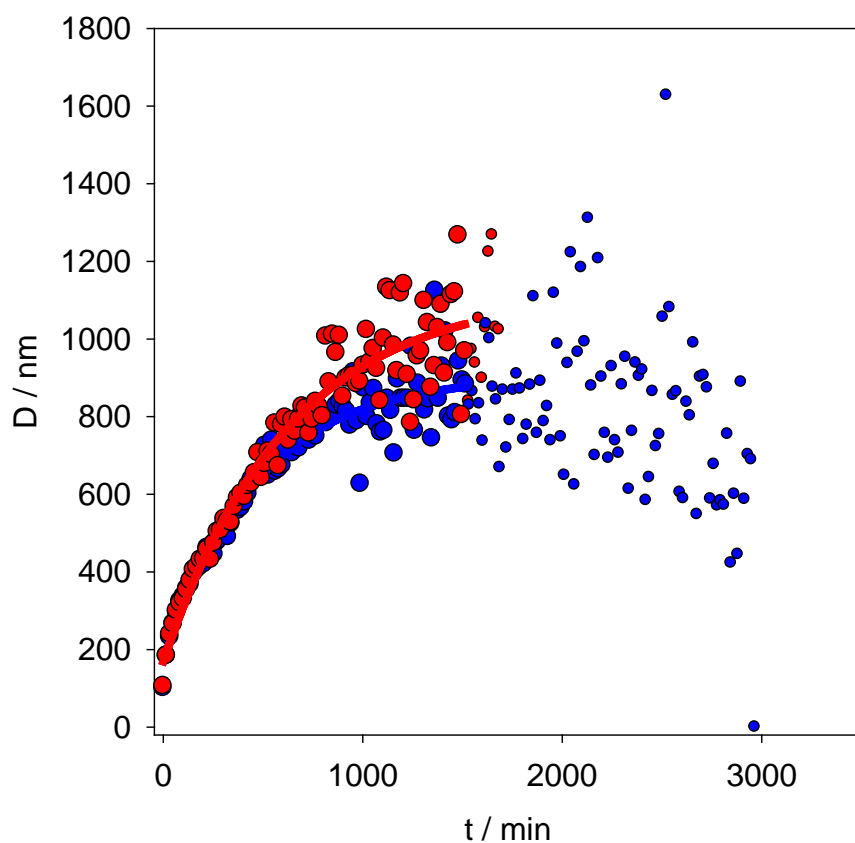

Figure 3 of SI: Evolution of the average hydrodynamic diameter of PAH-PSP "complexes in the presence of 1.0 M NaCl in the case where a volume  $V$  of PAH ( $2 \times 10^{-4}$  M in monomer units) is injected in an identical volume  $V$  of PSP ( $2 \times 10^{-4}$  M in monomer units) (●) or when the PSP solution is injected in the PAH solution (●). The full lines correspond to a fit of equation (1) to the experimental data. The fit was limited to the first 1500 min of the experiments.

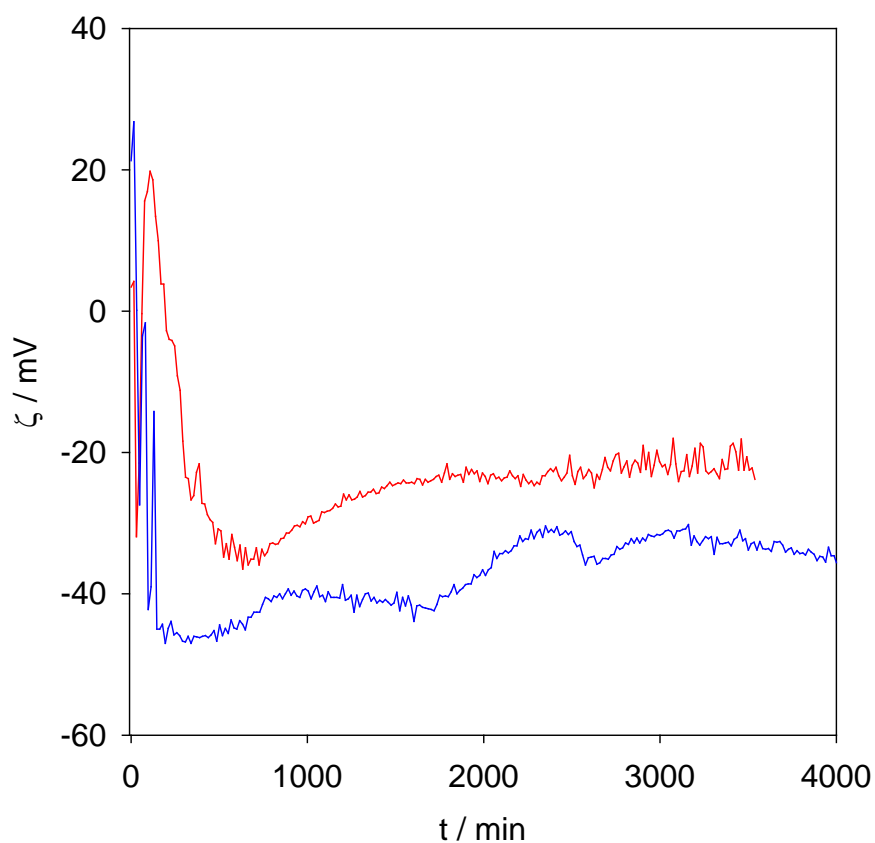

Figure 4 of SI: Evolution of the average zeta potential of PAH-PSP "complexes" in the presence of 10 mM NaCl in the case where a volume  $V$  of PAH ( $2 \times 10^{-4}$  M in monomer units) is injected in an identical volume  $V$  of PSP ( $2 \times 10^{-4}$  M in monomer units) (\_\_\_\_\_) or when the PSP solution is injected in the PAH solution (\_\_\_\_\_).

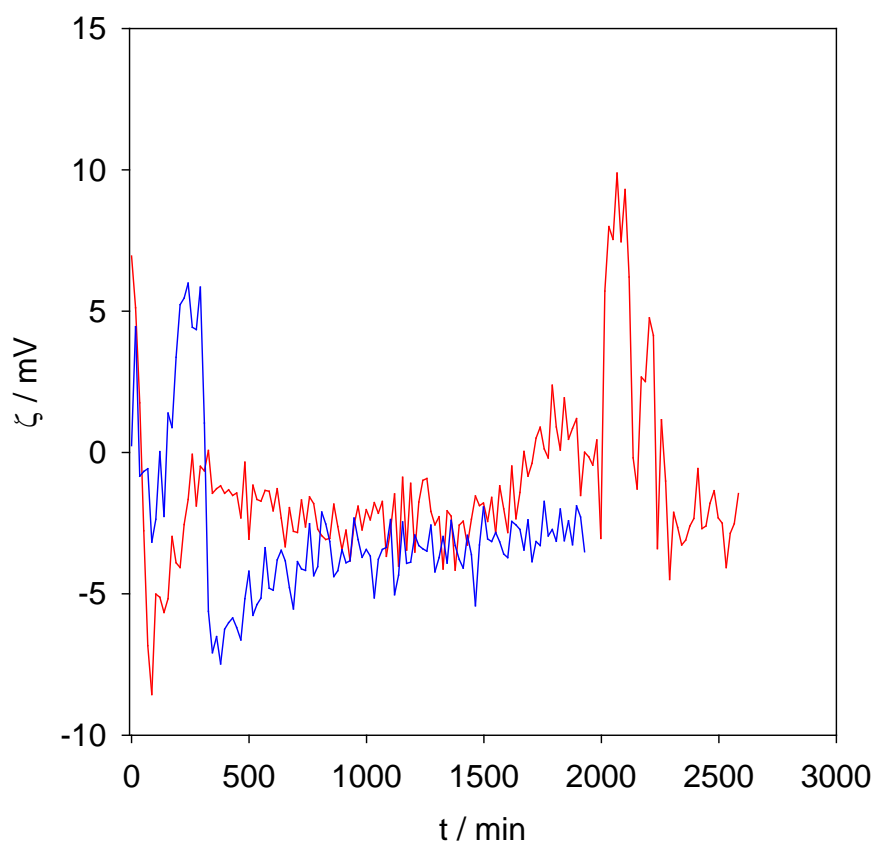

Figure 5 of SI: Evolution of the average zeta potential of PAH-PSP "complexes" in the presence of 1 M NaCl in the case where a volume  $V$  of PAH ( $2 \times 10^{-4}$  M in monomer units) is injected in an identical volume  $V$  of PSP ( $2 \times 10^{-4}$  M in monomer units) (\_\_\_\_\_) or when the PSP solution is injected in the PAH solution (\_\_\_\_\_).

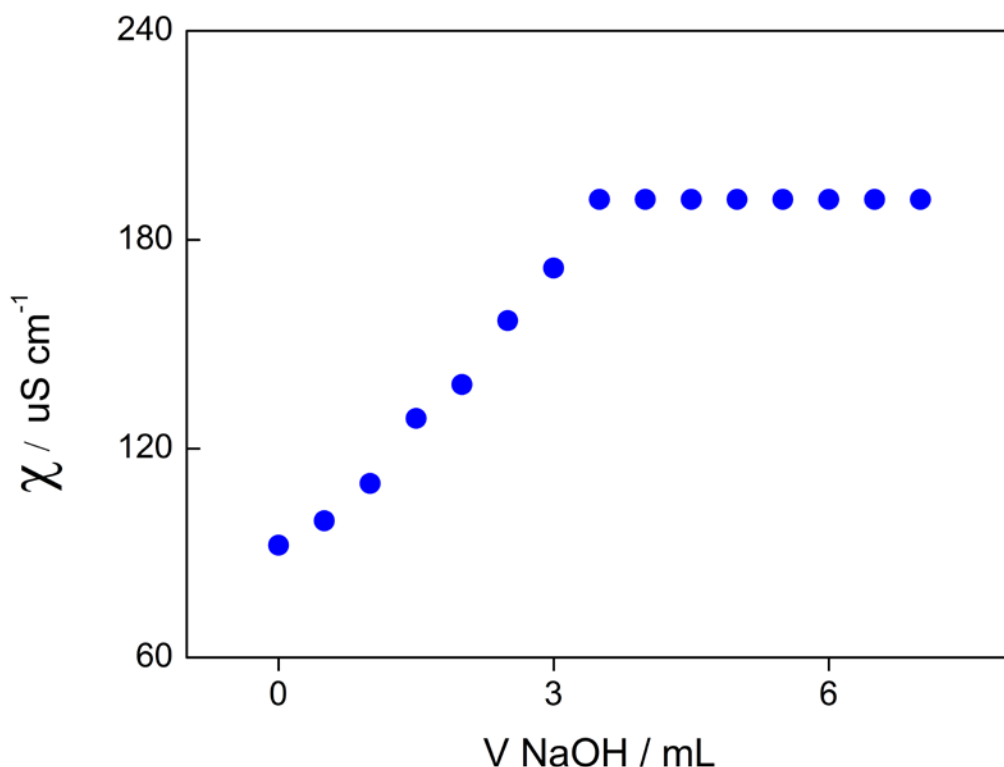

Figure 6 of SI: Conductometric titration curve of the supernatant, after centrifugation of the complexes with NaOH.

The PAH-PSP "complexes" were prepared in the presence of 0.15 M NaCl. A volume  $V$  of PAH ( $1 \times 10^{-4}$  M in monomer units) is mixed with an identical volume  $V$  of PSP ( $1 \times 10^{-4}$  M in monomer units). After allowing to equilibrate for 3000 minutes, the solution was centrifuged and the supernatant liquid was titrated with  $1 \times 10^{-4}$  M NaOH at constant temperature of  $25 \pm 0.02$  °C. The amount of PAH remaining in the supernatant solution, hence the amount of uncomplexed PAH was calculated, and the stoichiometry of the PAH-PSP complexes was found as 1.1:1 in mol/mol.
